# Supplementary material for: Serological Documentation of Maternal Influenza Exposure and Bipolar Disorder in Adult Offspring
Source: Atypon-hosted journal article supplement (doi:10.1176/appi.ajp.2013.13070943), 2014-01-31
Supplement: 557_ds001.pdf [file 557_ds001.pdf]

Figure S1. Ascertainment of the study sample with bipolar disorder (BD)

<sup>a</sup> From database linkages with Kaiser Permanente Medical Care Plan (KPNC) and Alameda County Behavioral Health Care Services (ACBHCS) (see “Methods” for further description of database diagnoses) and subjects screening positive following mailed questionnaire on mental health to mothers and offspring in CHDS cohort. There was overlap between the sources of BD cases: KPNC, ACBHCS, CHDS Mailing, Prenatal Determinants of Schizophrenia (PDS I). For each source of cases, the numbers of cases found in at least one other source among the total number of cases from that respective source, were as follows: KPNC (22 of 50), ACBHCS (14 of 24), CHDS Mailing (11 of 30), PDS I (18 of 26). For subjects ascertained based on mailing to mothers and offspring in the CHDS cohort, surveys indicating mental health problems were returned from 535 subjects. Among these, FIGS were completed on 376 subjects, and of these 80 subjects screened positive for bipolar disorder or psychosis. All 80 were sought for interview.

<sup>b</sup> Includes deceased, incarcerated, no permission from physician, too ill (psychosis, severe mental disability)

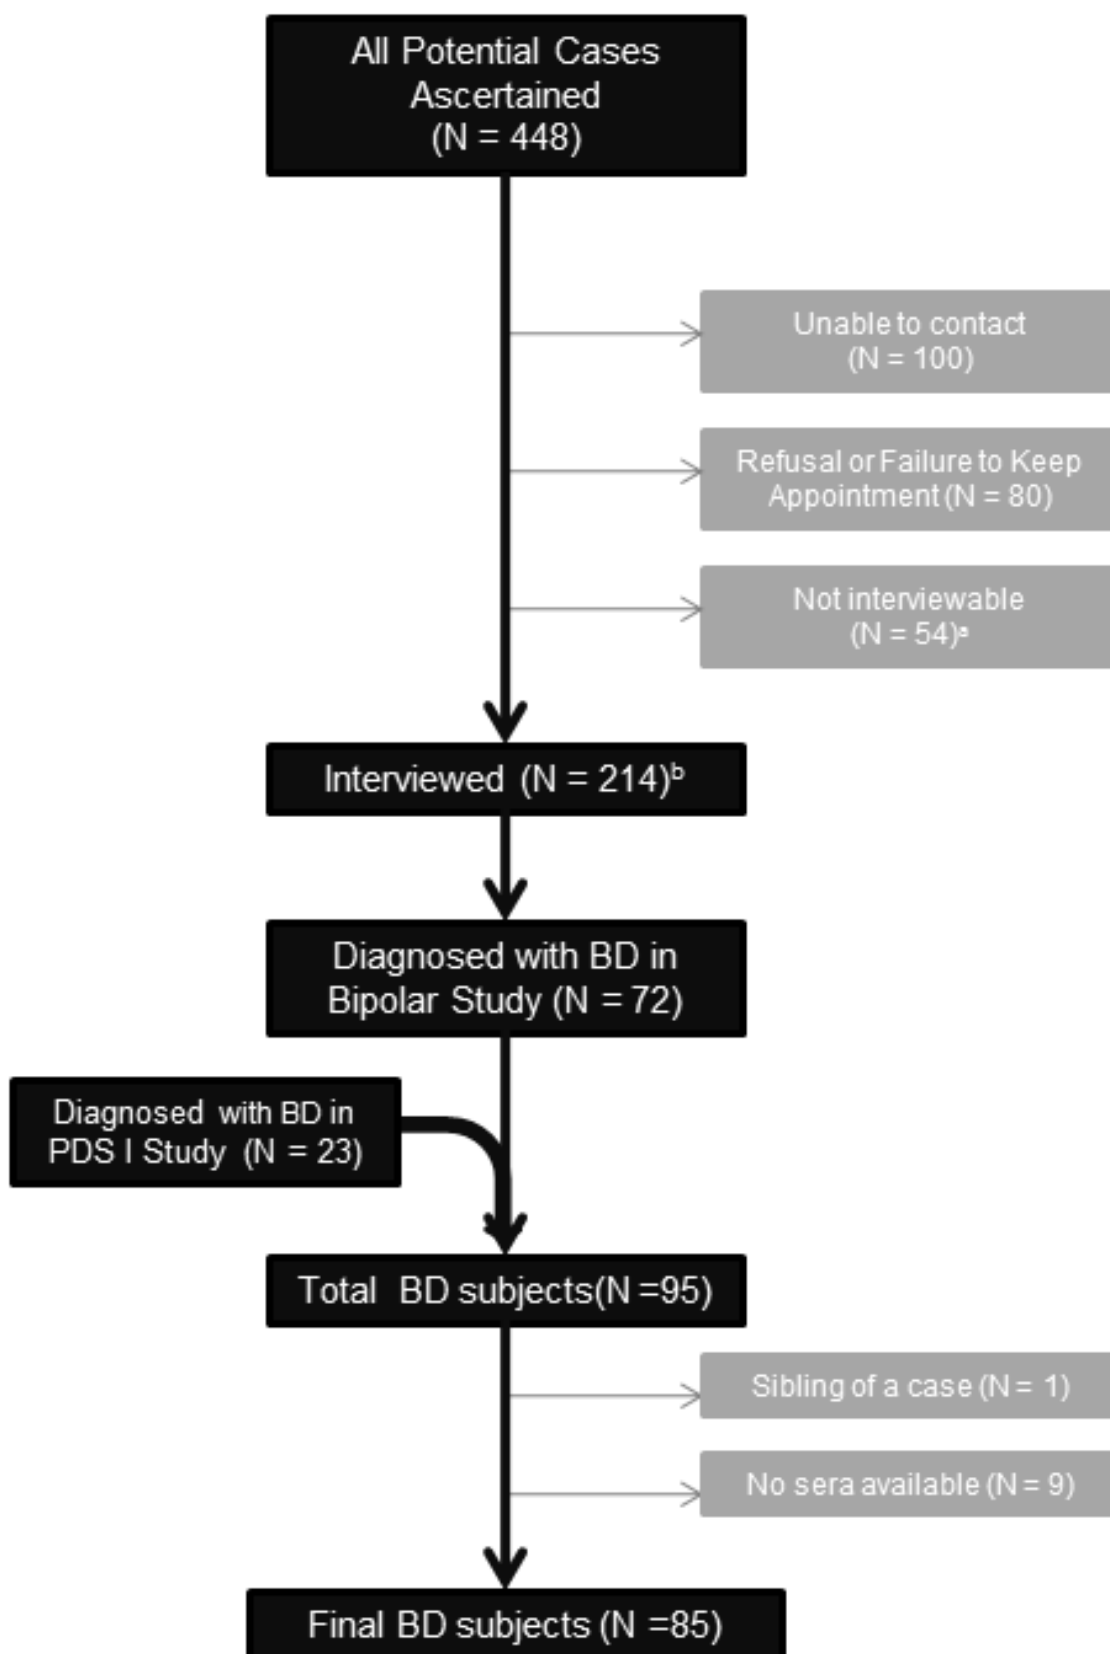

**Table S1. Distribution of serum specimens available for each pregnancy**

| Number of Specimens | Number of Pregnancies |
|---------------------|-----------------------|
| 1                   | 60                    |
| 2                   | 87                    |
| 3                   | 108                   |

**Table S2a. Serologic evidence of maternal exposure to influenza by trimester and risk of bipolar disorder in offspring**

| Gestational Timing of Influenza Exposure | Cases   |               | Controls |               | Odds Ratio (95% CI) | P    |
|------------------------------------------|---------|---------------|----------|---------------|---------------------|------|
|                                          | Total N | Exposed N (%) | Total N  | Exposed N (%) |                     |      |
| First Trimester                          | 51      | 13 (25.5)     | 102      | 21 (20.6)     | 1.40 (0.58-3.35)    | 0.45 |
| Second Trimester                         | 73      | 8 (11.0)      | 146      | 16 (11.0)     | 1.00 (0.38-2.66)    | 1.00 |
| Third Trimester                          | 62      | 2 (3.2)       | 124      | 3 (2.4)       | 1.44 (0.19-11.12)   | 0.72 |

**Table S2b. Serologic evidence of maternal exposure to influenza by trimester and risk of bipolar disorder without psychotic features in offspring**

| Gestational Timing of Influenza Exposure | Cases   |               | Controls |               | Odds Ratio (95% CI) | P    |
|------------------------------------------|---------|---------------|----------|---------------|---------------------|------|
|                                          | Total N | Exposed N (%) | Total N  | Exposed N (%) |                     |      |
| First Trimester                          | 30      | 6 (20.0)      | 60       | 15 (25.0)     | 0.68 (0.19-2.38)    | 0.54 |
| Second Trimester                         | 43      | 2 (4.7)       | 86       | 11 (12.8)     | 0.29 (0.06-1.47)    | 0.14 |
| Third Trimester                          | 38      | 1 (2.6)       | 76       | 1 (1.3)       | 2.00 (0.13-31.97)   | 0.62 |
